# Supplementary material
Source: PubMed Central journal article supplement (PMC4882454)
Supplement: 10.1074_M116.723577_jbc.M116.723577-1.pdf [file 10.1074_M116.723577_jbc.M116.723577-1.pdf]

## **Supplemental data**

Cholesterol Hydroxylase CYP46A1: Mapping of the Allosteric Site for Efavirenz, a Drug that Stimulates Enzyme Activity

**Kyle W. Anderson<sup>#§</sup>, Natalia Mast<sup>¶</sup>, Jeffrey W. Hudgens<sup>#§</sup>, Joseph B. Lin<sup>¶</sup>, Illarion V. Turko<sup>#§</sup>, and Irina A. Pikuleva<sup>¶</sup>**

From the <sup>#</sup>Biomolecular Measurement Division, National Institute of Standards and Technology, Gaithersburg, MD 20899; <sup>§</sup>Institute for Bioscience and Biotechnology Research, Rockville, MD 20850; and the <sup>¶</sup>Department of Ophthalmology and Visual Sciences, Case Western Reserve University, Cleveland, OH 44106

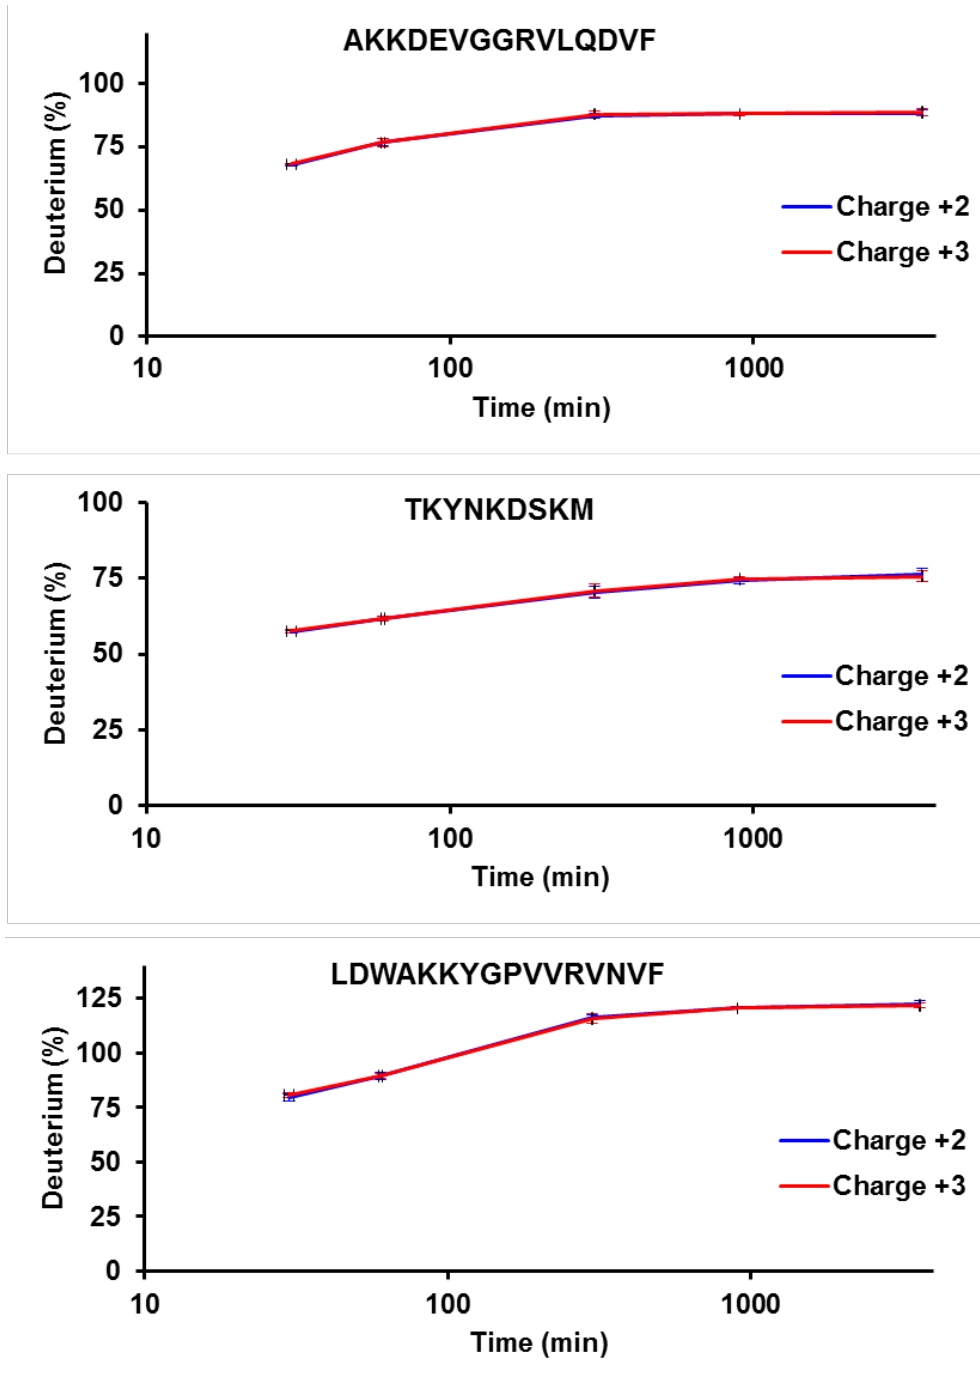

**FIGURE S1. Peptide charge consensus and precision in MS measurements.** More than one charge state was detected for many CYP46A1 peptides as indicated by deuterium uptake plots for three representative CYP46A1 peptides. Despite different charge states, the plots are nearly identical, both in averages and standard deviations. Accordingly, either charge state could be selected for analysis to reduce redundancy in measurements. The high degree of consensus between charge states and negligible standard deviations also demonstrates the precision in individual measurements.

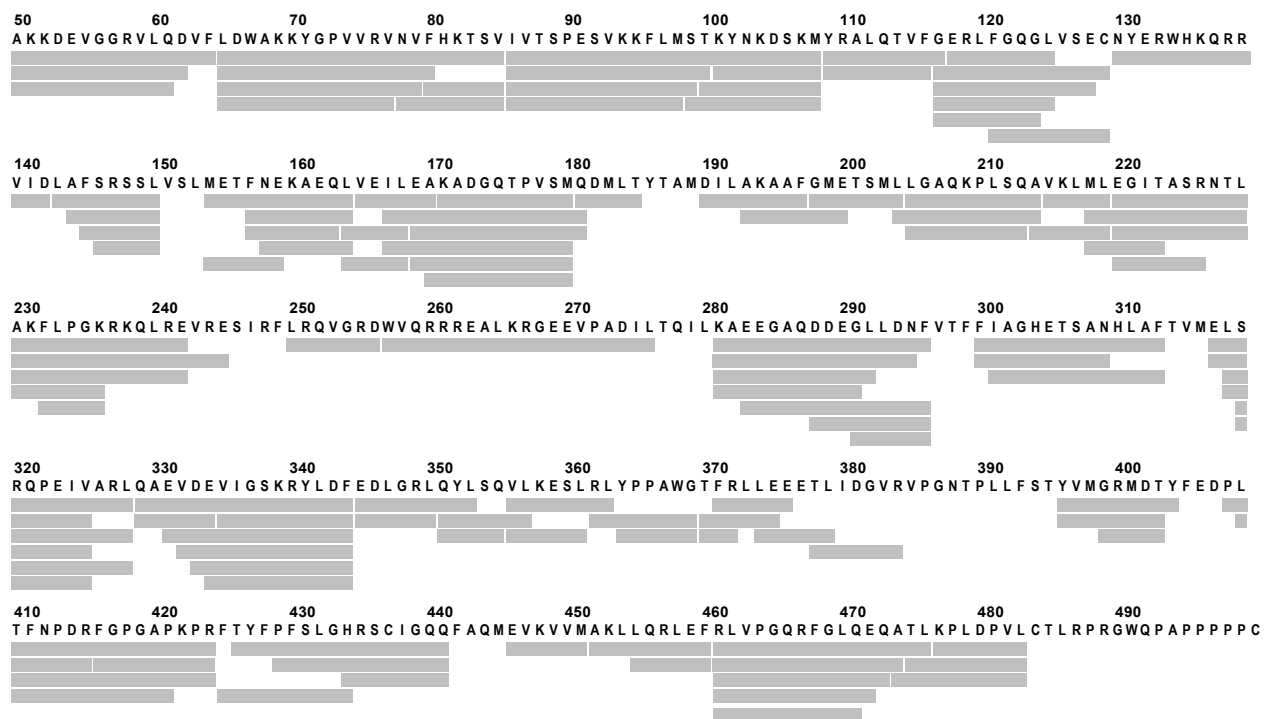

FIGURE S2. **Differential HDX analysis of EFV-bound CYP46A1 vs substrate-free CYP46A1.** Each bar below CYP46A1 primary sequence indicates a peptide identified by MS. All identified peptides are colored *gray* because there were no significant changes in  $\Delta D\%$ .

**A**

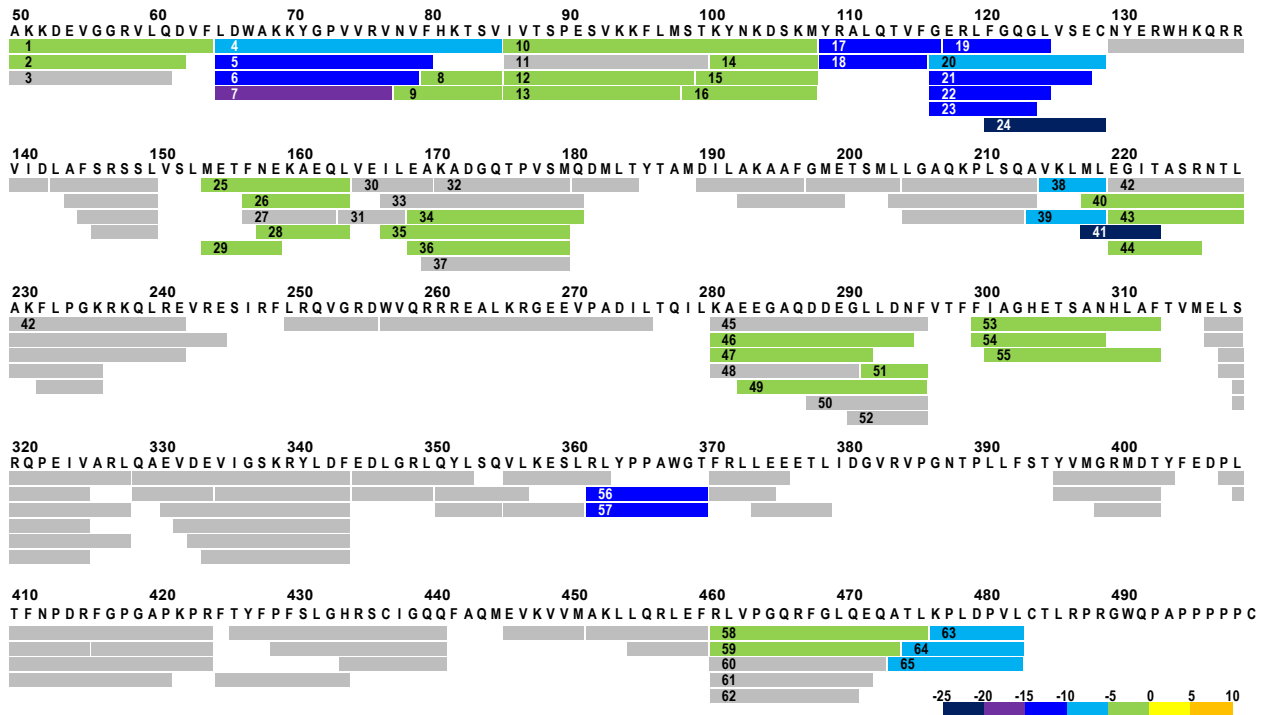

**B**

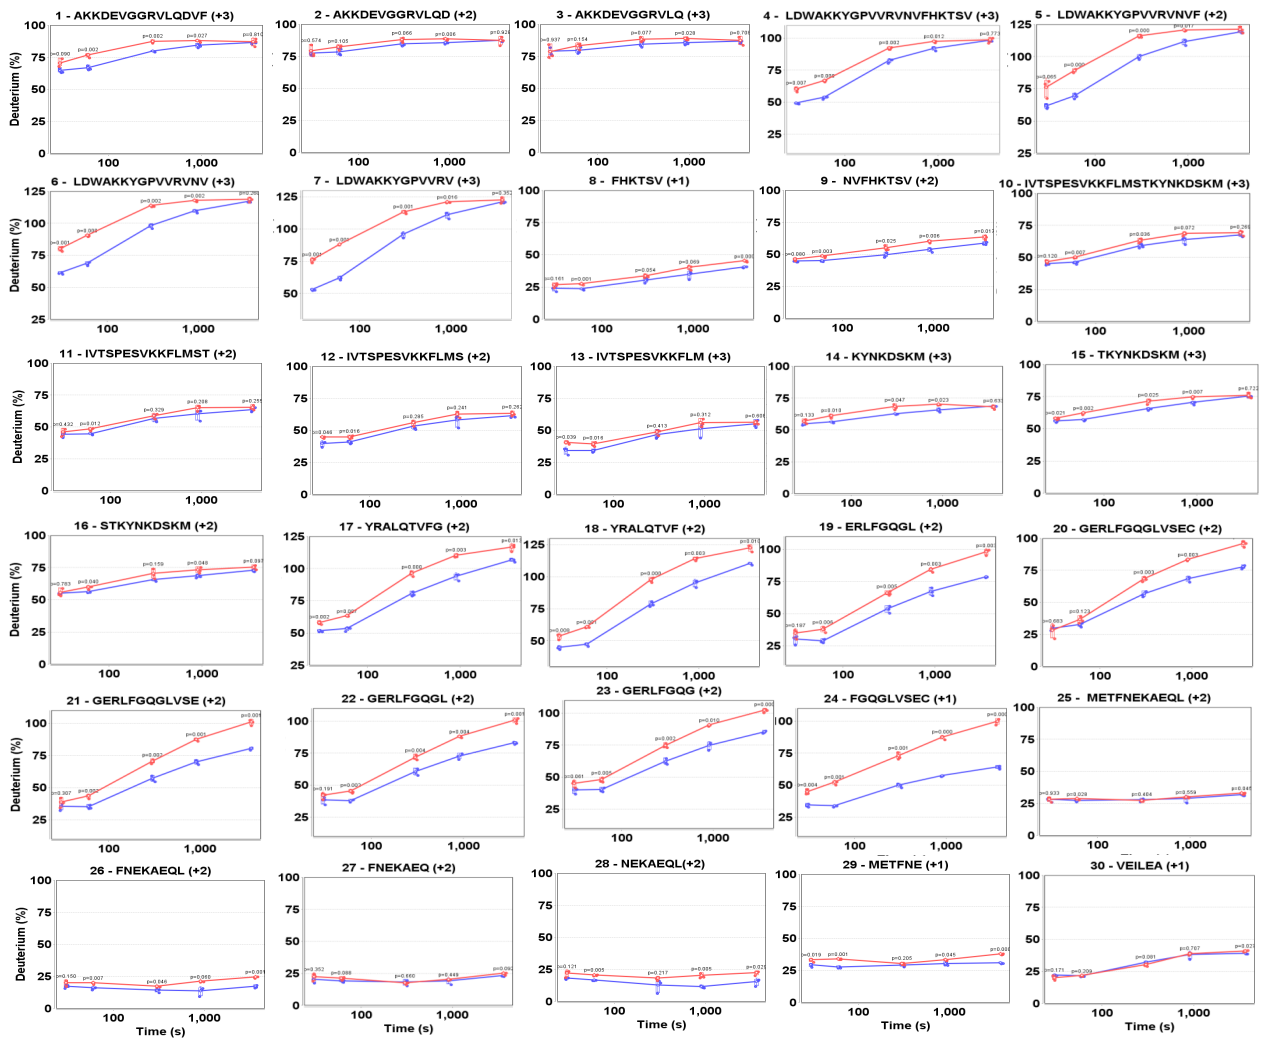

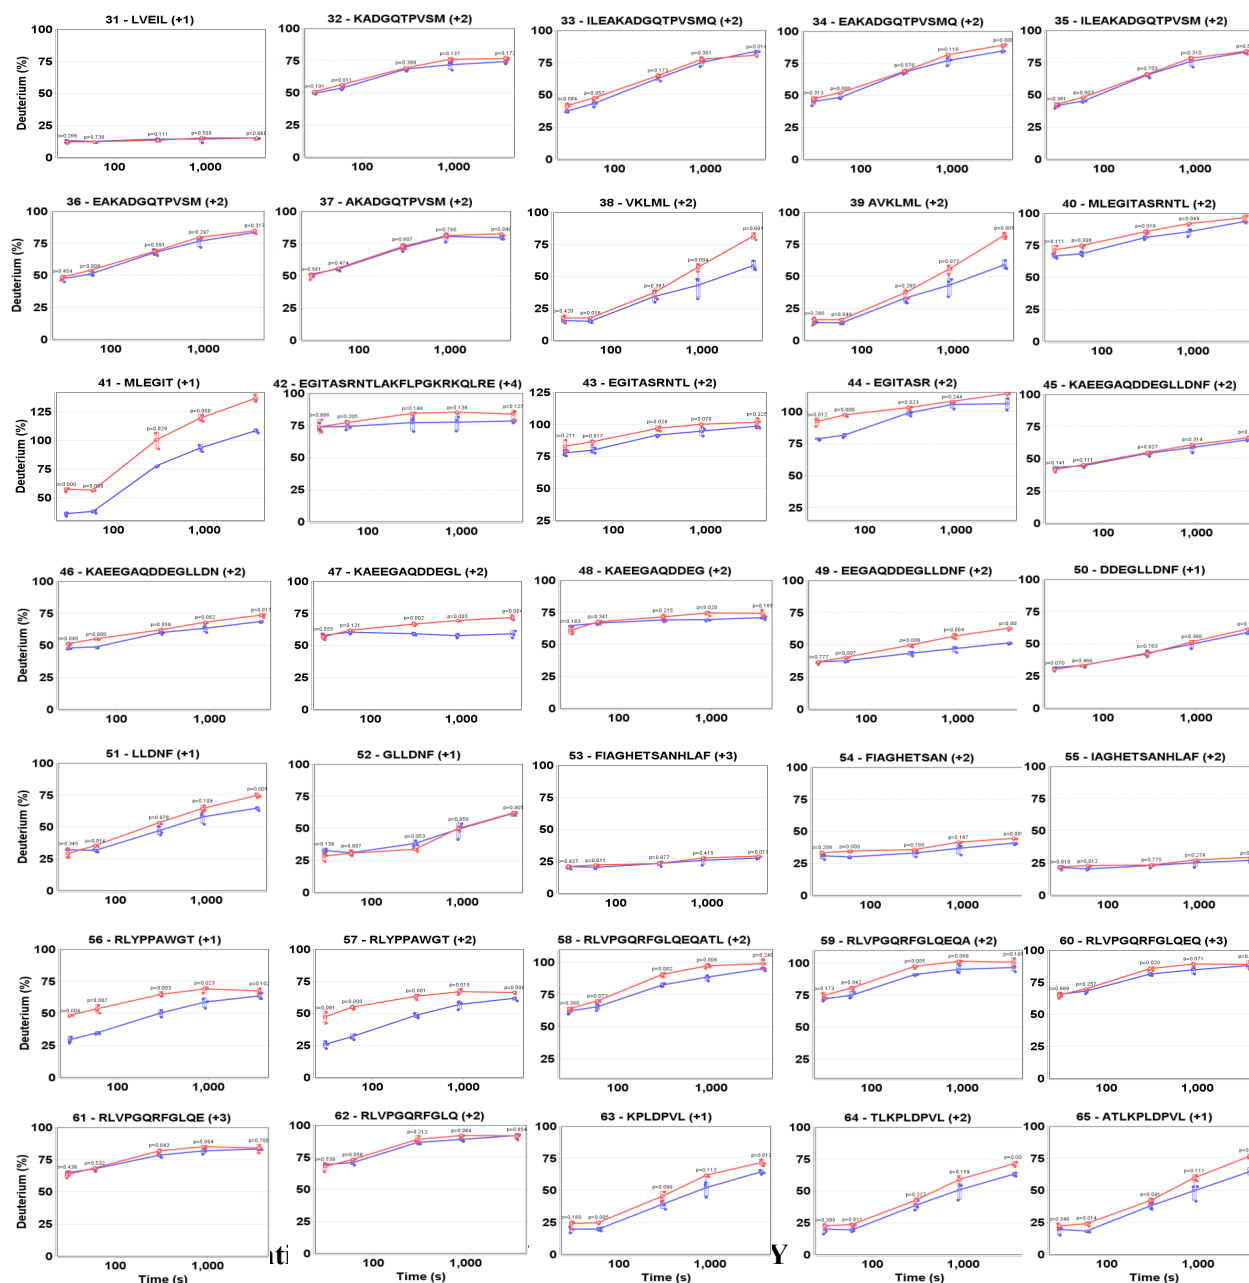

FIGURE S3. **Differential HDX analysis of cholesterol-bound CYP46A1 vs substrate-free CYP46A1.** *A*, Sequence coverage map of CYP46A1 with each bar indicating a peptide identified by MS. Inside numbers represent peptide numeration. Colored bars show negative  $\Delta D\%$  values according to the color code at the panel bottom. Gray bars indicate CYP46A1 regions with no changes in  $\Delta D\%$ . *B*, Kinetics of deuterium incorporation in 65 CYP46A1 peptides for substrate-bound CYP46A1 (blue) and substrate-free CYP46A1 (red). Most of these 65 peptides were used for the consolidation of the CYP46A1 regions with statistically significant changes in  $\Delta D\%$ . The results are means  $\pm$  SD of triplicate measurements.

**A**

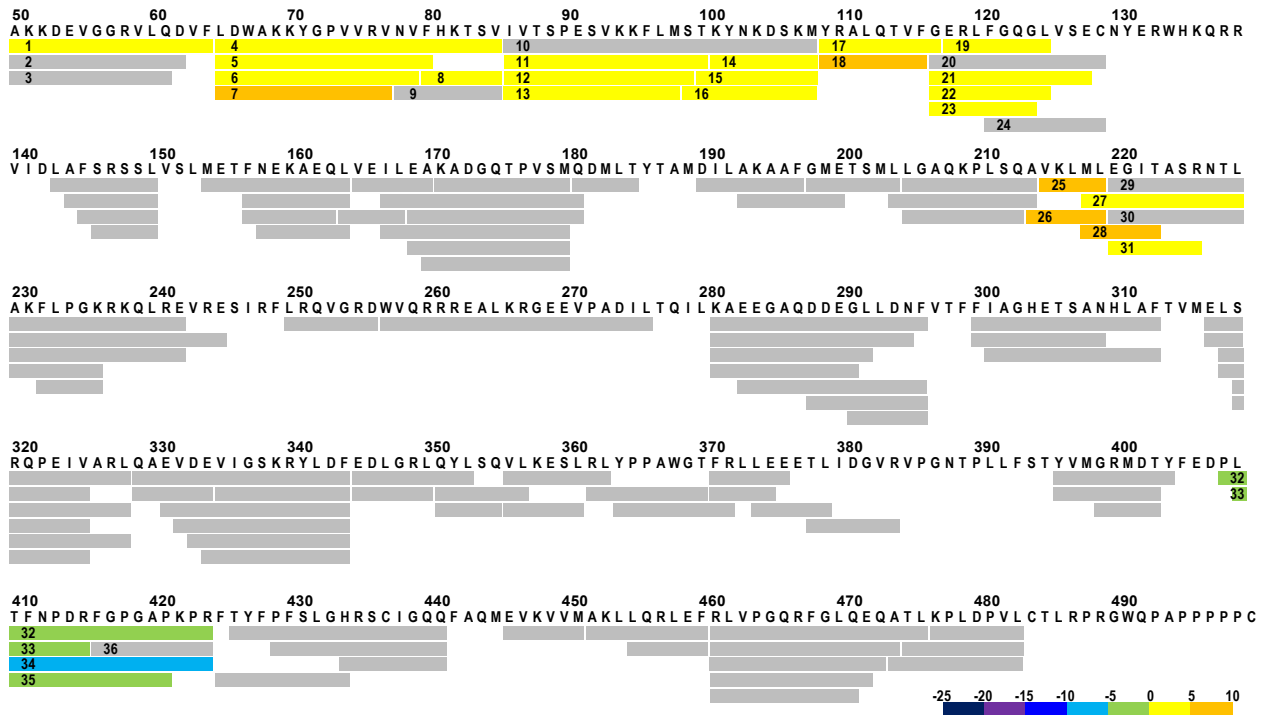

**B**

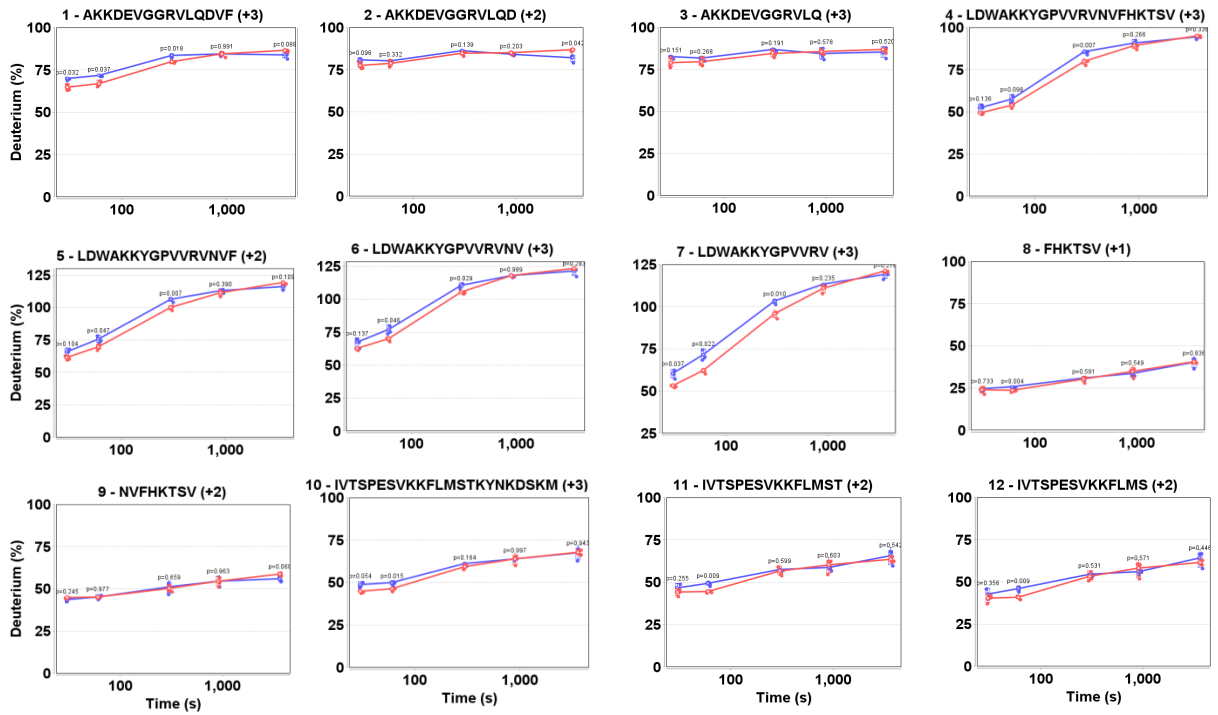

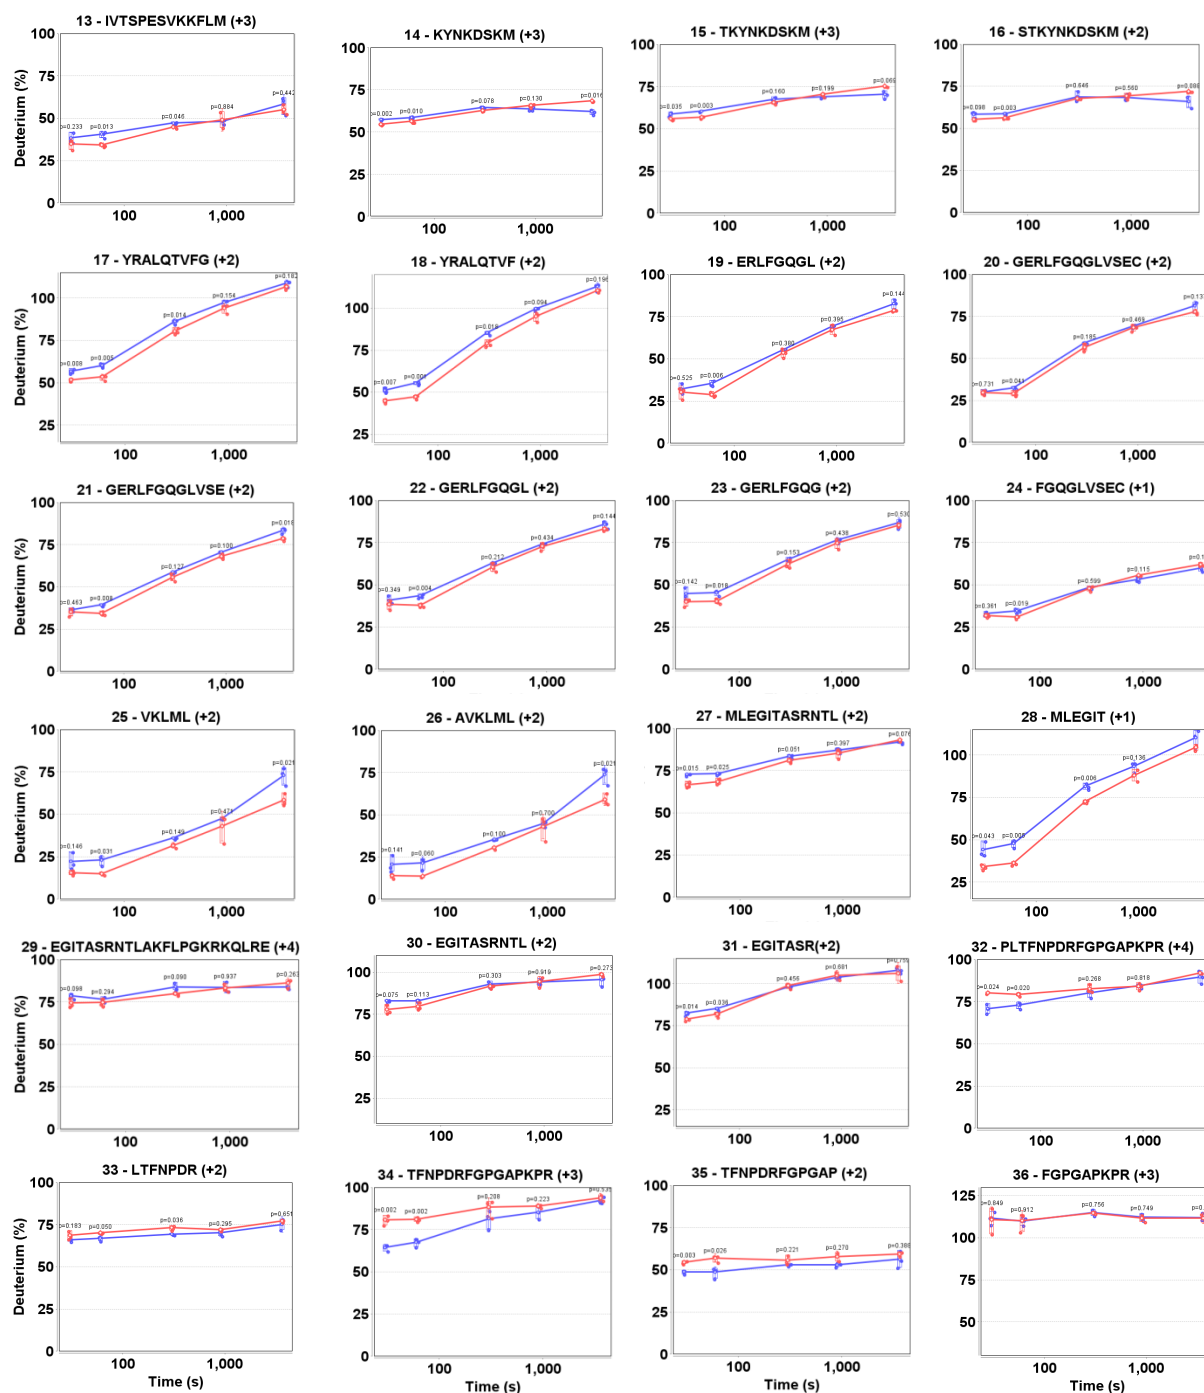

FIGURE S4. **Differential HDX analysis of the CYP46A1 double complex with EFV and cholesterol vs CYP46A1 complex with cholesterol.** *A*, Sequence coverage map of CYP46A1 with each bar indicating a peptide identified by MS. Inside numbers represent peptide numeration. Colored bars show negative and positive  $\Delta D\%$  values according to the color code at the panel bottom. Gray bars indicate CYP46A1 regions with no changes in  $\Delta D\%$ . *B*, Kinetics of deuterium incorporation in 36 CYP46A1 peptides for the P450 double complex with cholesterol and EFV (blue) and single complex with cholesterol (red). Most of these 36 peptides were used for the consolidation of the CYP46A1 regions with statistically significant changes in  $\Delta D\%$ . The results are means  $\pm$  SD of triplicate measurements.
